# Supplementary material for: Historic hydrological droughts 1891–2015: systematic characterisation for a diverse set of catchments across the UK
Source: Copernicus journal article supplement (doi:10.5194/hess-23-4583-2019), 2019-11-15
Supplement: Supplementary file 1 [file hess-23-4583-2019-supplement.pdf]

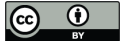

*Supplement of*

## **Historic hydrological droughts 1891–2015: systematic characterisation for a diverse set of catchments across the UK**

**Lucy J. Barker et al.**

*Correspondence to:* Lucy J. Barker ([lucybar@ceh.ac.uk](mailto:lucybar@ceh.ac.uk))

The copyright of individual parts of the supplement might differ from the CC BY 4.0 License.

**Table S1: The 108 LFBN catchments used in this study, their hydroclimate region and area (from: National River Flow Archive, 2019). For more information about catchments see the National River Flow Archive ([www.nrfa.ceh.ac.uk/](http://www.nrfa.ceh.ac.uk/)). The nine case study catchments are marked with an asterisk.**

| NRFA Station Number | Catchment Name                     | Hydroclimate Region | Area (km <sup>2</sup> ) |
|---------------------|------------------------------------|---------------------|-------------------------|
| 3003                | Oykel at Easter Turnaig            | WS                  | 330.7                   |
| 7001                | Findhorn at Shenachie              | WS                  | 415.6                   |
| 8004                | Avon at Delnashaugh                | ES                  | 542.8                   |
| 8009                | Dulnain at Balnaan Bridge          | ES                  | 272.2                   |
| 12001               | Dee at Woodend                     | ES                  | 1370                    |
| 12005               | Muick at Invermuick                | ES                  | 110                     |
| 16003               | Ruchill Water at Cultybraggan      | ES                  | 99.5                    |
| 17005               | Avon at Polmonthill                | ES                  | 195.3                   |
| *18001              | Allan Water at Kinbuck             | ES                  | 161                     |
| 20007               | Gifford Water at Lennoxlove        | ES                  | 64                      |
| 21017               | Ettrick Water at Brockhoperig      | ES                  | 37.5                    |
| 21024               | Jed Water at Jedburgh              | ES                  | 139                     |
| 22001               | Coquet at Morwick                  | NEE                 | 569.8                   |
| 23004               | South Tyne at Haydon Bridge        | NEE                 | 751.1                   |
| 24004               | Bedburn Beck at Bedburn            | NEE                 | 74.9                    |
| 25006               | Greta at Rutherford Bridge         | NEE                 | 86.1                    |
| 26003               | Foston Beck at Foston Mill         | NEE                 | 57.2                    |
| *27035              | Aire at Kildwick Bridge            | NEE                 | 282.3                   |
| 27042               | Dove at Kirkby Mills               | NEE                 | 59.2                    |
| 27047               | Snaizholme Beck at Low Houses      | NEE                 | 10.2                    |
| 27051               | Crimple at Burn Bridge             | NEE                 | 8.1                     |
| 27071               | Swale at Crakehill                 | NEE                 | 1363                    |
| 27073               | Brompton Beck at Snainton Ings     | NEE                 | 12.9                    |
| 28046               | Dove at Izaak Walton               | ST                  | 83                      |
| 28072               | Greet at Southwell                 | ST                  | 46.2                    |
| *29003              | Lud at Louth                       | ANG                 | 55.2                    |
| 29009               | Ancholme at Toft Newton            | ANG                 | 27.2                    |
| 30004               | Lymn at Partney Mill               | ANG                 | 61.6                    |
| 30012               | Stainfield Beck at Cream Poke Farm | ANG                 | 37.4                    |
| 30015               | Cringle Brook at Stoke Rochford    | ANG                 | 50.5                    |
| 32003               | Harpers Brook at Old Mill Bridge   | ANG                 | 74.3                    |
| 33018               | Tove at Cappenham Bridge           | ANG                 | 138.1                   |
| 33029               | Stringside at Whitebridge          | ANG                 | 98.8                    |
| 34011               | Wensum at Fakenham                 | ANG                 | 161.9                   |
| 36003               | Box at Polstead                    | ANG                 | 53.9                    |
| 37005               | Colne at Lexden                    | ANG                 | 238.2                   |
| 38026               | Pincey Brook at Sheering Hall      | SE                  | 54.6                    |
| *39019              | Lambourn at Shaw                   | SE                  | 234.1                   |
| 39020               | Coln at Bibury                     | SE                  | 106.7                   |
| 39025               | Enborne at Brimpton                | SE                  | 147.6                   |
| 39028               | Dun at Hungerford                  | SE                  | 101.3                   |
| 39034               | Evenlode at Cassington Mill        | SE                  | 430                     |
| 40011               | Great Stour at Horton              | SE                  | 345                     |
| 41022               | Lod at Halfway Bridge              | SE                  | 52                      |
| 41025               | Loxwood Stream at Drungewick       | SE                  | 91.6                    |

| <b>NRFA Station Number</b> | <b>Catchment Name</b>                | <b>Hydroclimate Region</b> | <b>Area (km<sup>2</sup>)</b> |
|----------------------------|--------------------------------------|----------------------------|------------------------------|
| 41027                      | Rother at Princes Marsh              | SE                         | 37.2                         |
| 41029                      | Bull at Lealands                     | SE                         | 40.8                         |
| 42003                      | Lymington at Brockenhurst            | SE                         | 98.9                         |
| 42008                      | Cheriton Stream at Swards Bridge     | SE                         | 75.1                         |
| 43014                      | East Avon at Upavon                  | SE                         | 85.78                        |
| 44006                      | Sydling Water at Sydling St Nicholas | SE                         | 12.4                         |
| 45005                      | Otter at Dotton                      | SWESW                      | 202.5                        |
| 46005                      | East Dart at Bellever                | SWESW                      | 21.5                         |
| 47009                      | Tiddy at Tideford                    | SWESW                      | 37.2                         |
| 48003                      | Fal at Tregony                       | SWESW                      | 87                           |
| 49004                      | Gannel at Gwills                     | SWESW                      | 41                           |
| 50002                      | Torridge at Torrington               | SWESW                      | 663                          |
| 52010                      | Brue at Lovington                    | SE                         | 135.2                        |
| 52016                      | Currypool Stream at Currypool Farm   | SE                         | 15.7                         |
| 53006                      | Frome (Bristol) at Frenchay          | SE                         | 148.9                        |
| 53008                      | Avon at Great Somerford              | SE                         | 303                          |
| 53009                      | Wellow Brook at Wellow               | SE                         | 72.6                         |
| 53017                      | Boyd at Bitton                       | SE                         | 47.9                         |
| *54008                     | Teme at Tenbury                      | ST                         | 1134.4                       |
| 54018                      | Rea Brook at Hookagate               | ST                         | 178                          |
| 54025                      | Dulas at Rhos-y-pentref              | ST                         | 52.7                         |
| 54034                      | Dowles Brook at Oak Cottage          | ST                         | 40.8                         |
| 55014                      | Lugg at Byton                        | SWESW                      | 203.3                        |
| 55016                      | Ithon at Disserth                    | SWESW                      | 358                          |
| 55026                      | Wye at Ddol Farm                     | SWESW                      | 174                          |
| 55029                      | Monnow at Grosmont                   | SWESW                      | 354                          |
| 56013                      | Yscir at Pont-Ar-Yscir               | SWESW                      | 62.8                         |
| *57004                     | Cynon at Abercynon                   | SWESW                      | 106                          |
| 60002                      | Cothi at Felin Mynachdy              | SWESW                      | 297.8                        |
| 60003                      | Taf at Clog-y-Fran                   | SWESW                      | 217.3                        |
| 62001                      | Teifi at Glanteifi                   | SWESW                      | 893.6                        |
| 65001                      | Glaslyn at Beddgelert                | NWENW                      | 68.6                         |
| 65005                      | Erch at Pencaenewydd                 | NWENW                      | 18.1                         |
| 66004                      | Wheeler at Bodfari                   | NWENW                      | 62.9                         |
| 67018                      | Dee at New Inn                       | NWENW                      | 53.9                         |
| 68005                      | Weaver at Audlem                     | NWENW                      | 207                          |
| 72005                      | Lune at Killington                   | NWENW                      | 219                          |
| 72014                      | Conder at Galgate                    | NWENW                      | 28.5                         |
| 73005                      | Kent at Sedgwick                     | NWENW                      | 209                          |
| 73011                      | Mint at Mint Bridge                  | NWENW                      | 65.8                         |
| *75017                     | Ellen at Bullgill                    | NWENW                      | 96                           |
| 76014                      | Eden at Kirkby Stephen               | NWENW                      | 69.4                         |
| 77004                      | Kirtle Water at Mossknowe            | WS                         | 72                           |
| 78004                      | Kinnel Water at Redhall              | WS                         | 76.1                         |
| 79002                      | Nith at Friars Carse                 | WS                         | 799                          |
| 79004                      | Scar Water at Capenoch               | WS                         | 142                          |
| *81002                     | Cree at Newton Stewart               | WS                         | 368                          |
| 81004                      | Bladnoch at Low Malzie               | WS                         | 334                          |

| <b>NRFA Station Number</b> | <b>Catchment Name</b>        | <b>Hydroclimate Region</b> | <b>Area (km<sup>2</sup>)</b> |
|----------------------------|------------------------------|----------------------------|------------------------------|
| 83006                      | Ayr at Mainholm              | WS                         | 574                          |
| 83010                      | Irvine at Newmilns           | WS                         | 72.8                         |
| 84022                      | Duneaton at Maidencots       | WS                         | 110.3                        |
| 85003                      | Falloch at Glen Falloch      | WS                         | 80.3                         |
| 90003                      | Nevis at Claggan             | WS                         | 69.2                         |
| 93001                      | Carron at New Kelso          | WS                         | 137.8                        |
| 94001                      | Ewe at Poolewe               | WS                         | 441.1                        |
| 96002                      | Naver at Apigill             | WS                         | 477                          |
| 201008                     | Derg at Castlederg           | NI                         | 335.4                        |
| 202002                     | Faughan at Drumahoe          | NI                         | 273.1                        |
| 203028                     | Agivey at Whitehill          | NI                         | 100.5                        |
| *203042                    | Crumlin at Cidercourt Bridge | NI                         | 55.3                         |
| 204001                     | Bush at Seneirl Bridge       | NI                         | 299.2                        |
| 205008                     | Lagan at Drumiller           | NI                         | 84.6                         |
| 206001                     | Clanrye at Mountmill Bridge  | NI                         | 120.3                        |

**Table S2: Catchments and months with missing SSI-3 values**

| <b>NRFA Station Number</b> | <b>Catchment Name</b>       | <b>Months with missing SSI-3 values</b> | <b>Impact</b>                                                                                                                                         |
|----------------------------|-----------------------------|-----------------------------------------|-------------------------------------------------------------------------------------------------------------------------------------------------------|
| 29003                      | Lud at Louth                | 2007-09                                 | No impact on the extracted drought events                                                                                                             |
| 40011                      | Great Stour at Horton       | 1921-12                                 | Splits a drought event which without the missing value would be the longest (and most severe in terms of accumulated deficit) event in this catchment |
| 54034                      | Dowles Brook at Oak Cottage | 2007-07; 2007-08                        | No impact on the extracted drought events                                                                                                             |
| 72014                      | Conder at Galgate           | 1907-07                                 | No impact on the extracted drought events                                                                                                             |

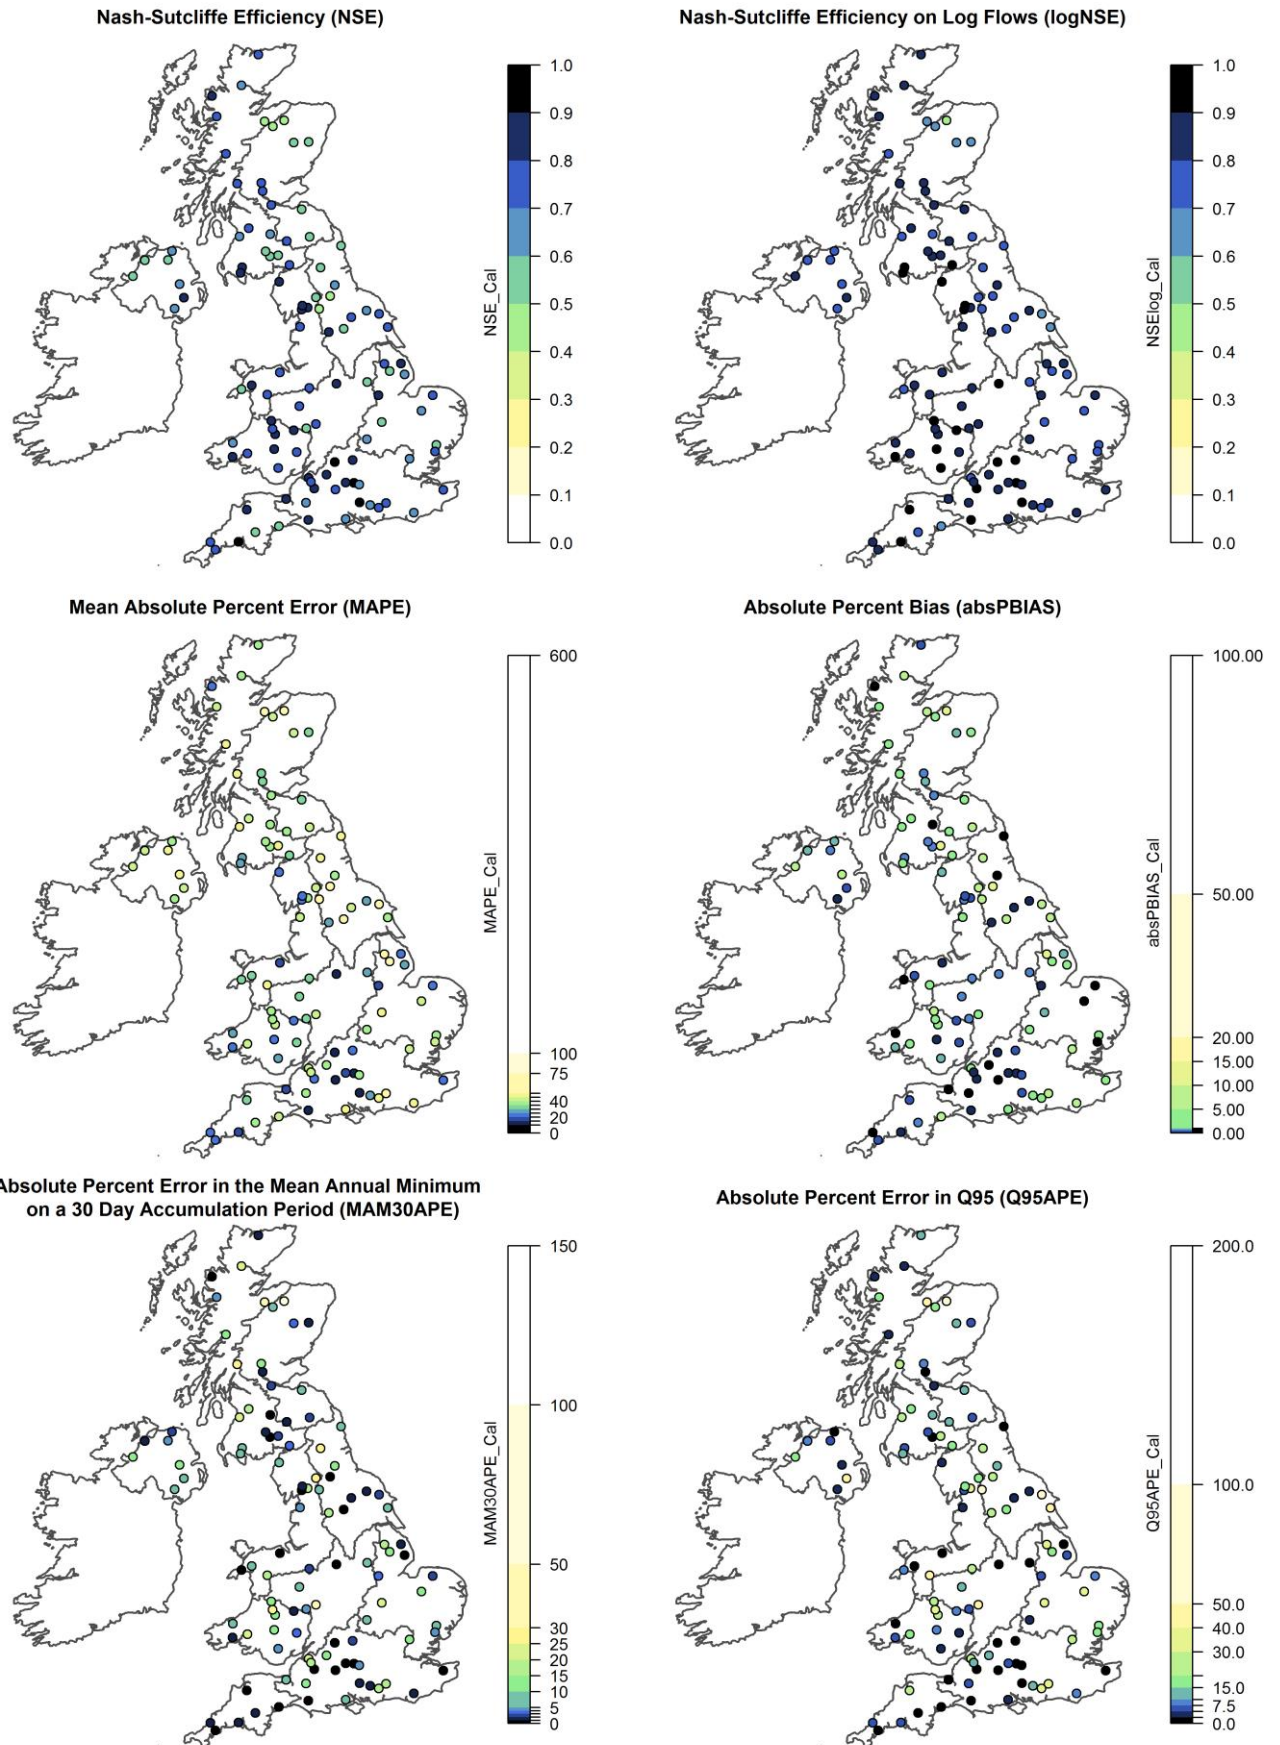

**Figure S1: Model performance metrics from Smith et al. (2018) for the 108 LFBN catchments used in this study. Darker colours indicate better model performance.**

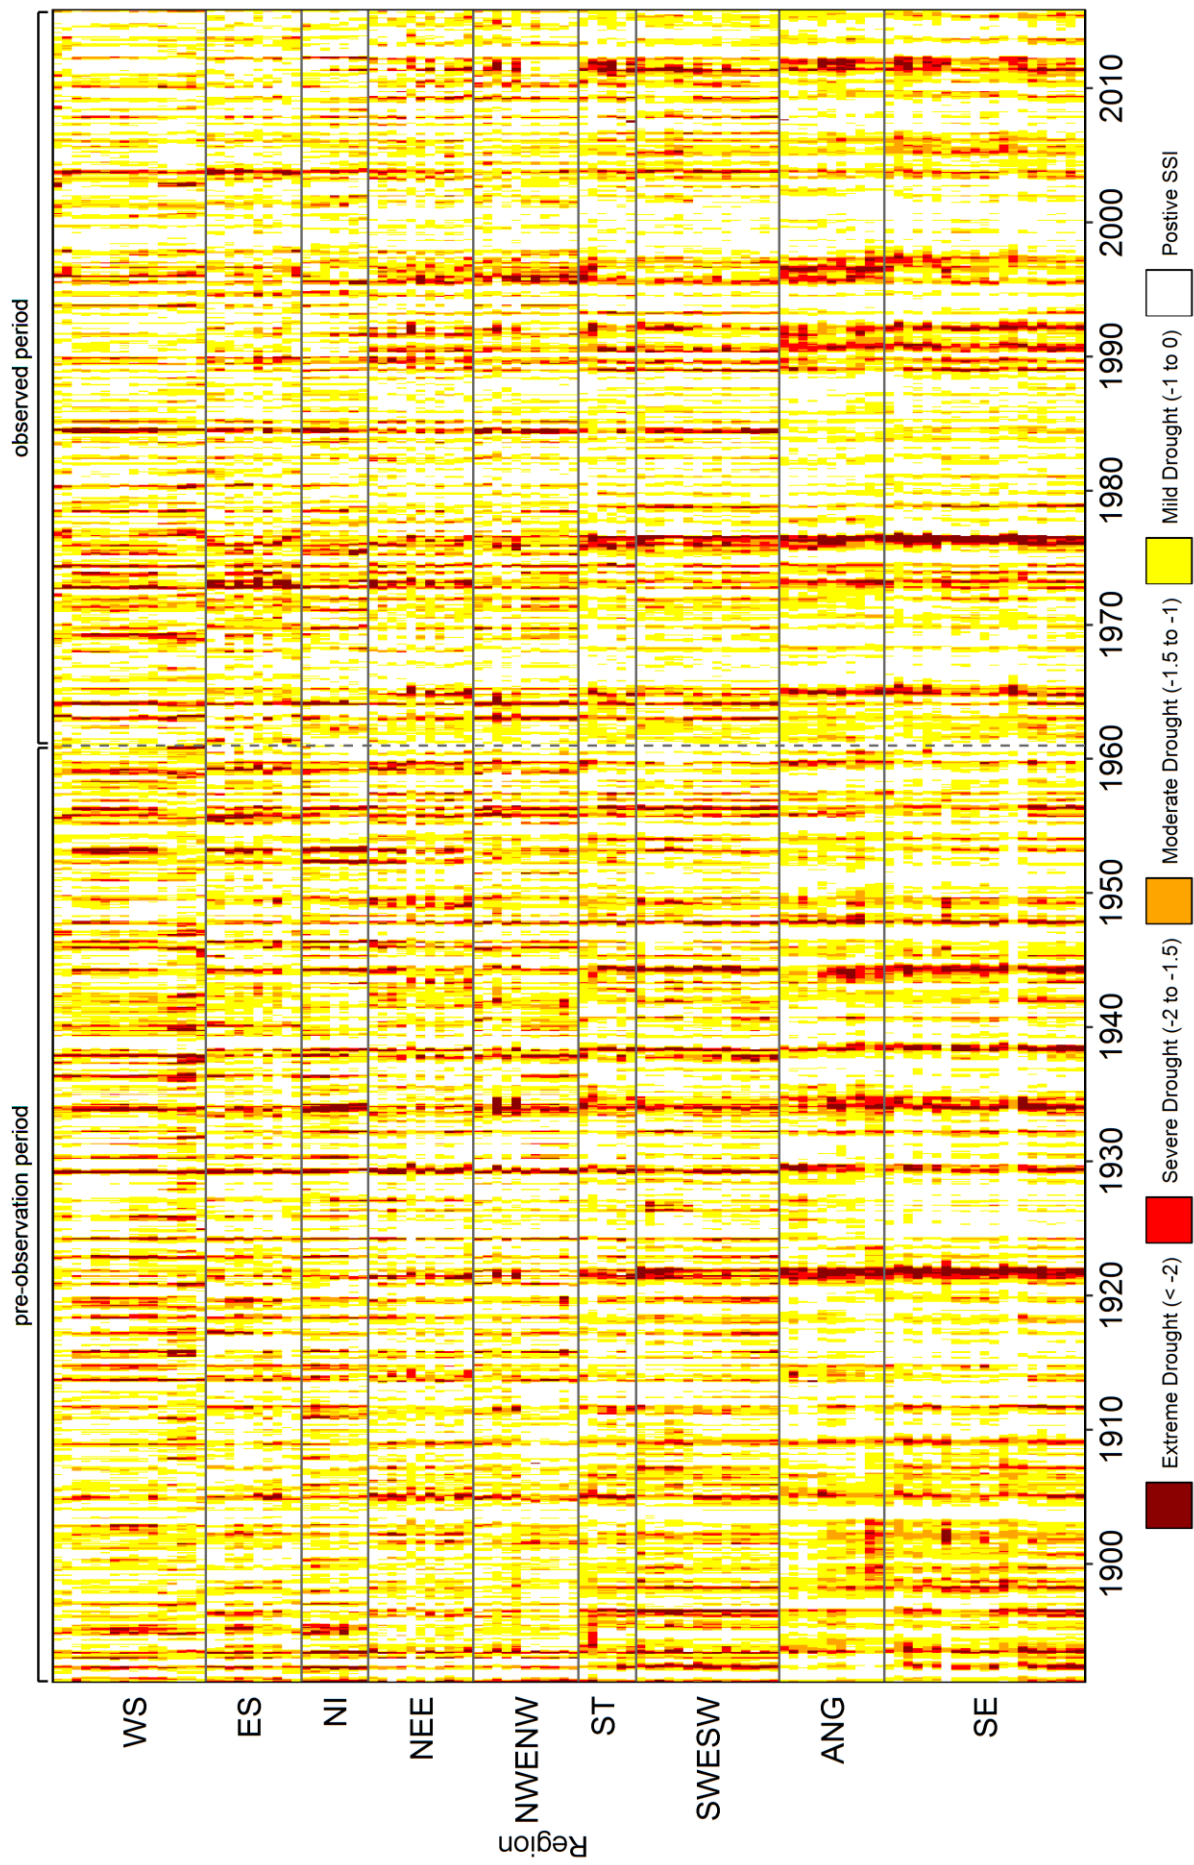

**Figure S2: Heatmap of SSI-3 for LFBN catchments (arranged roughly from north to south on the y-axis with one row per catchment and regions marked for clarity) from 1891 to 2015.**

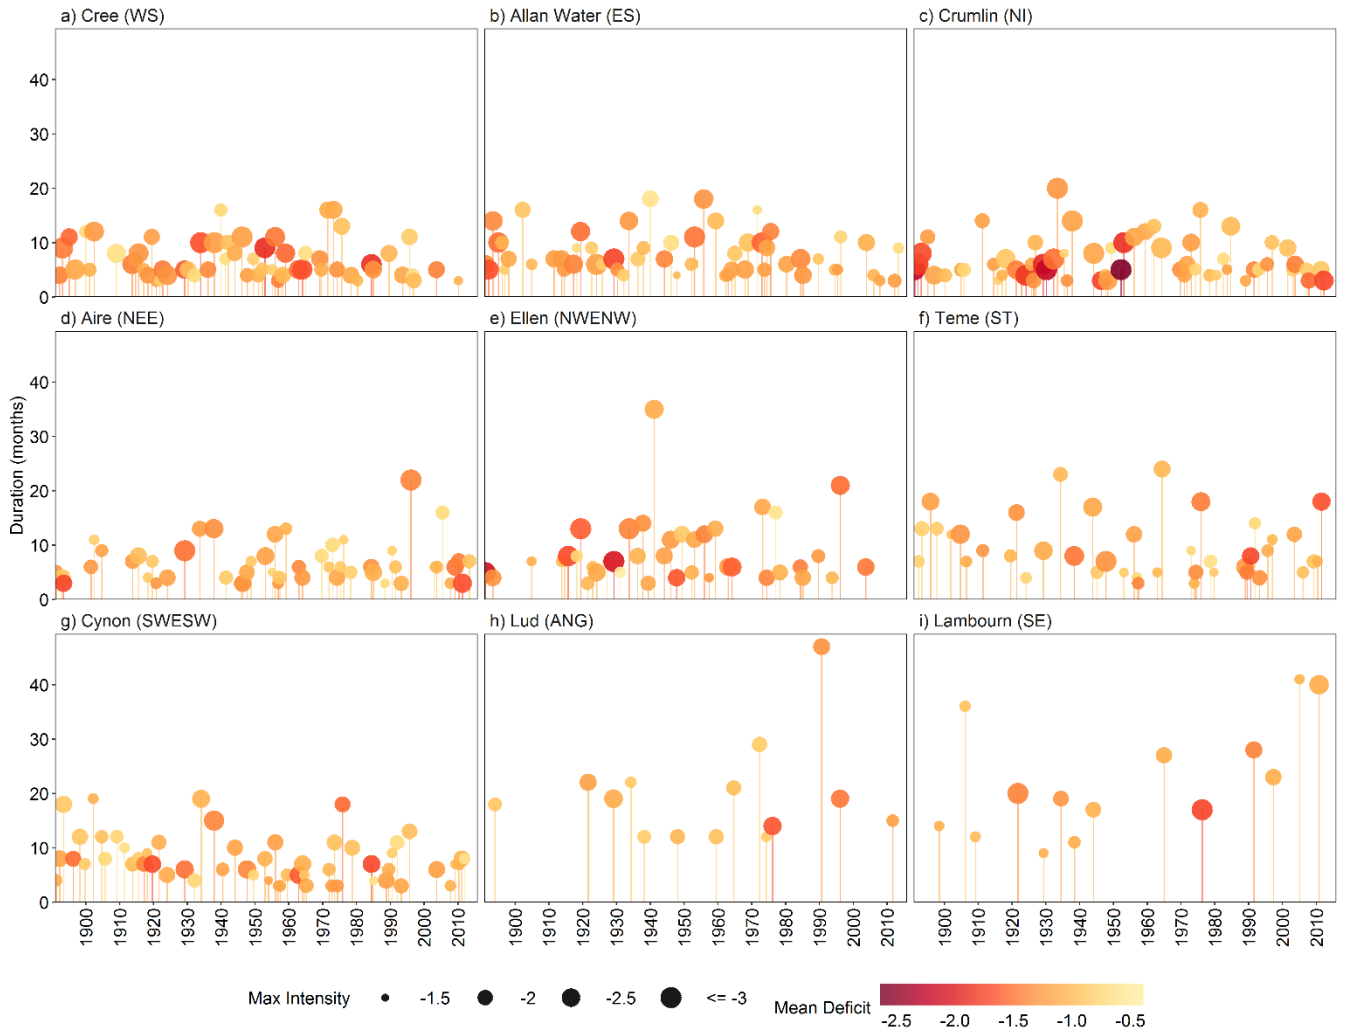

**Figure S3: Extracted events from SSI-3 and their characteristics for the nine case study catchments, plotted at the midpoint of the event. The size of each point is proportional to the maximum intensity and the colour indicates the mean deficit.**

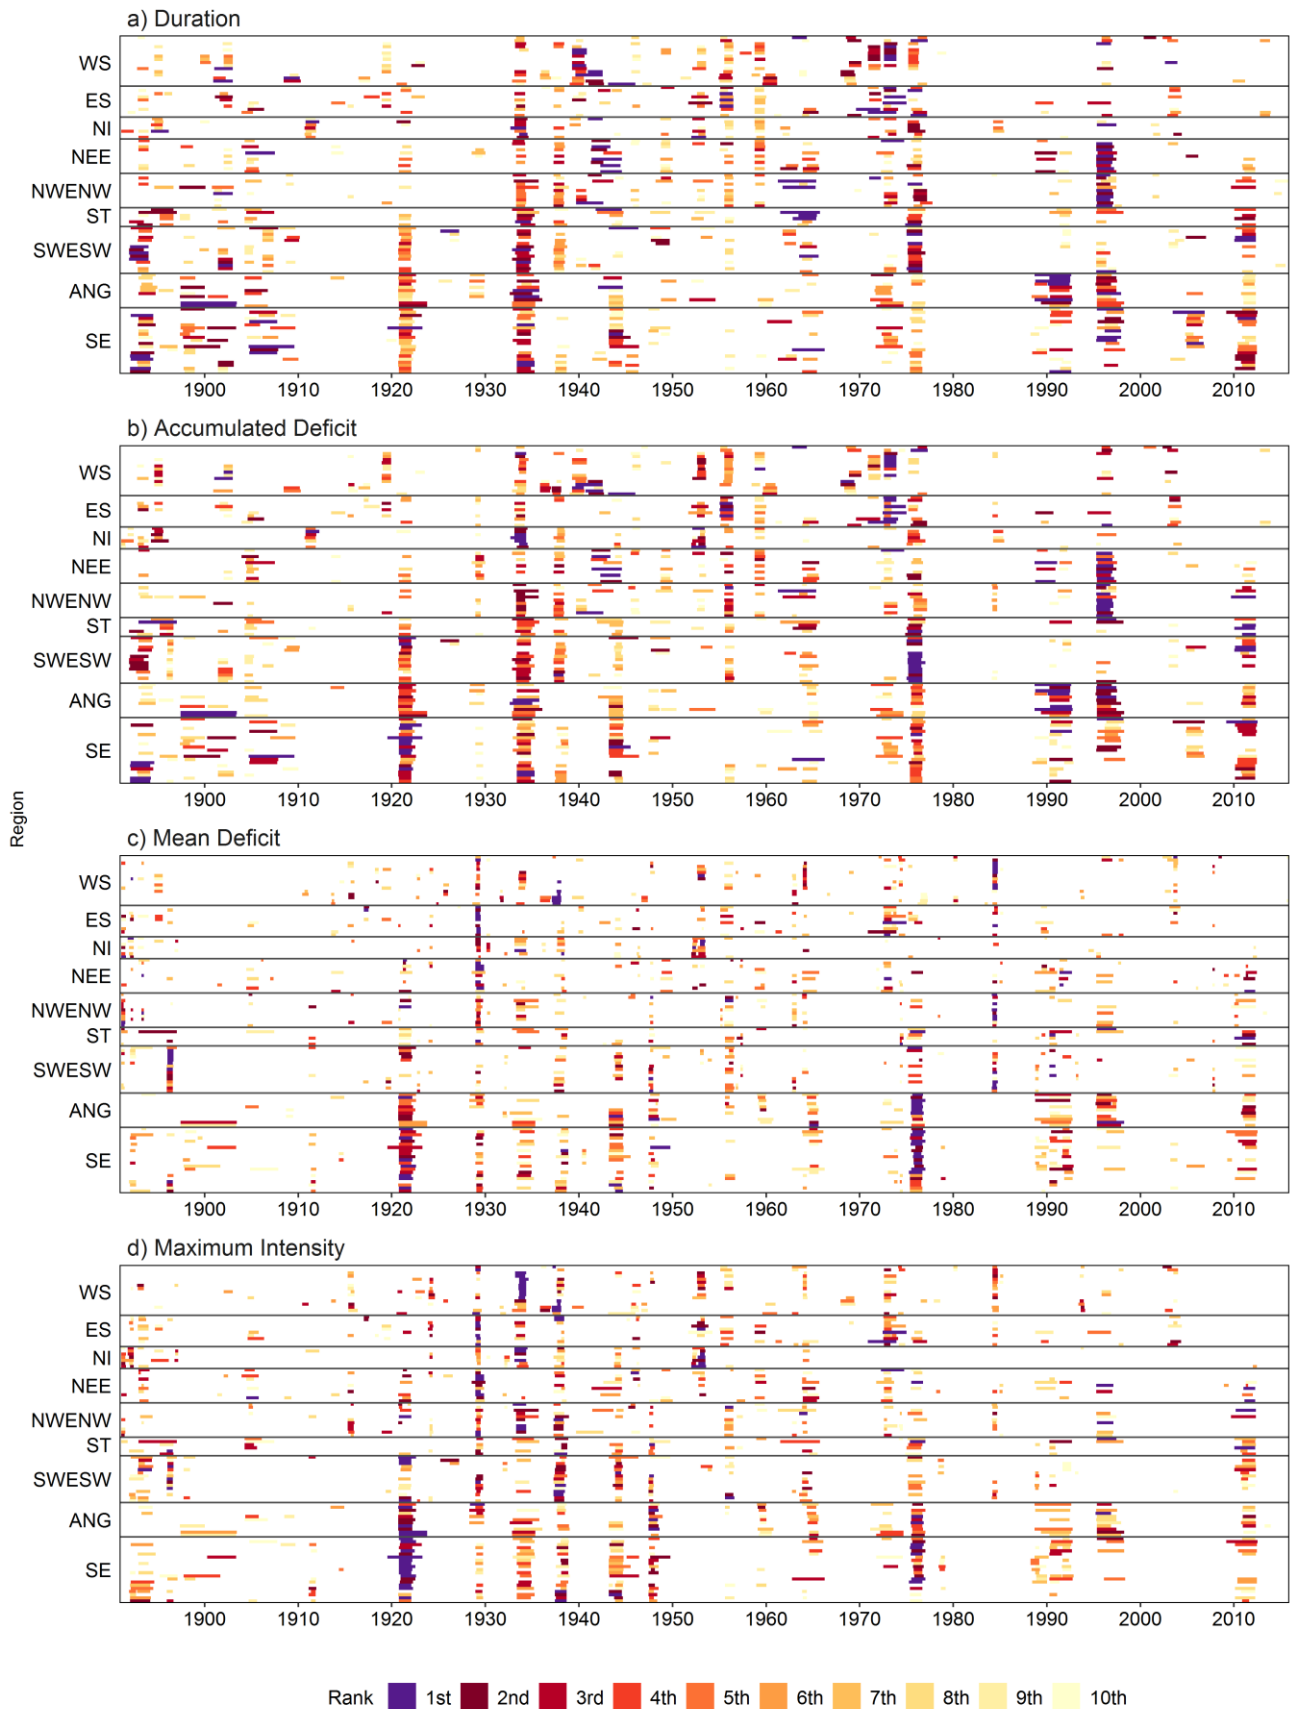

**Figure S4: Top 10 extracted events from SSI-3 using a threshold of -1.5 for each drought event characteristic. Catchments are arranged roughly from north to south on the y-axis with each row representing a catchment. Bars represent the top 10 events and are coloured according to the event rank; darker shades represent higher ranking (i.e. more severe) events.**

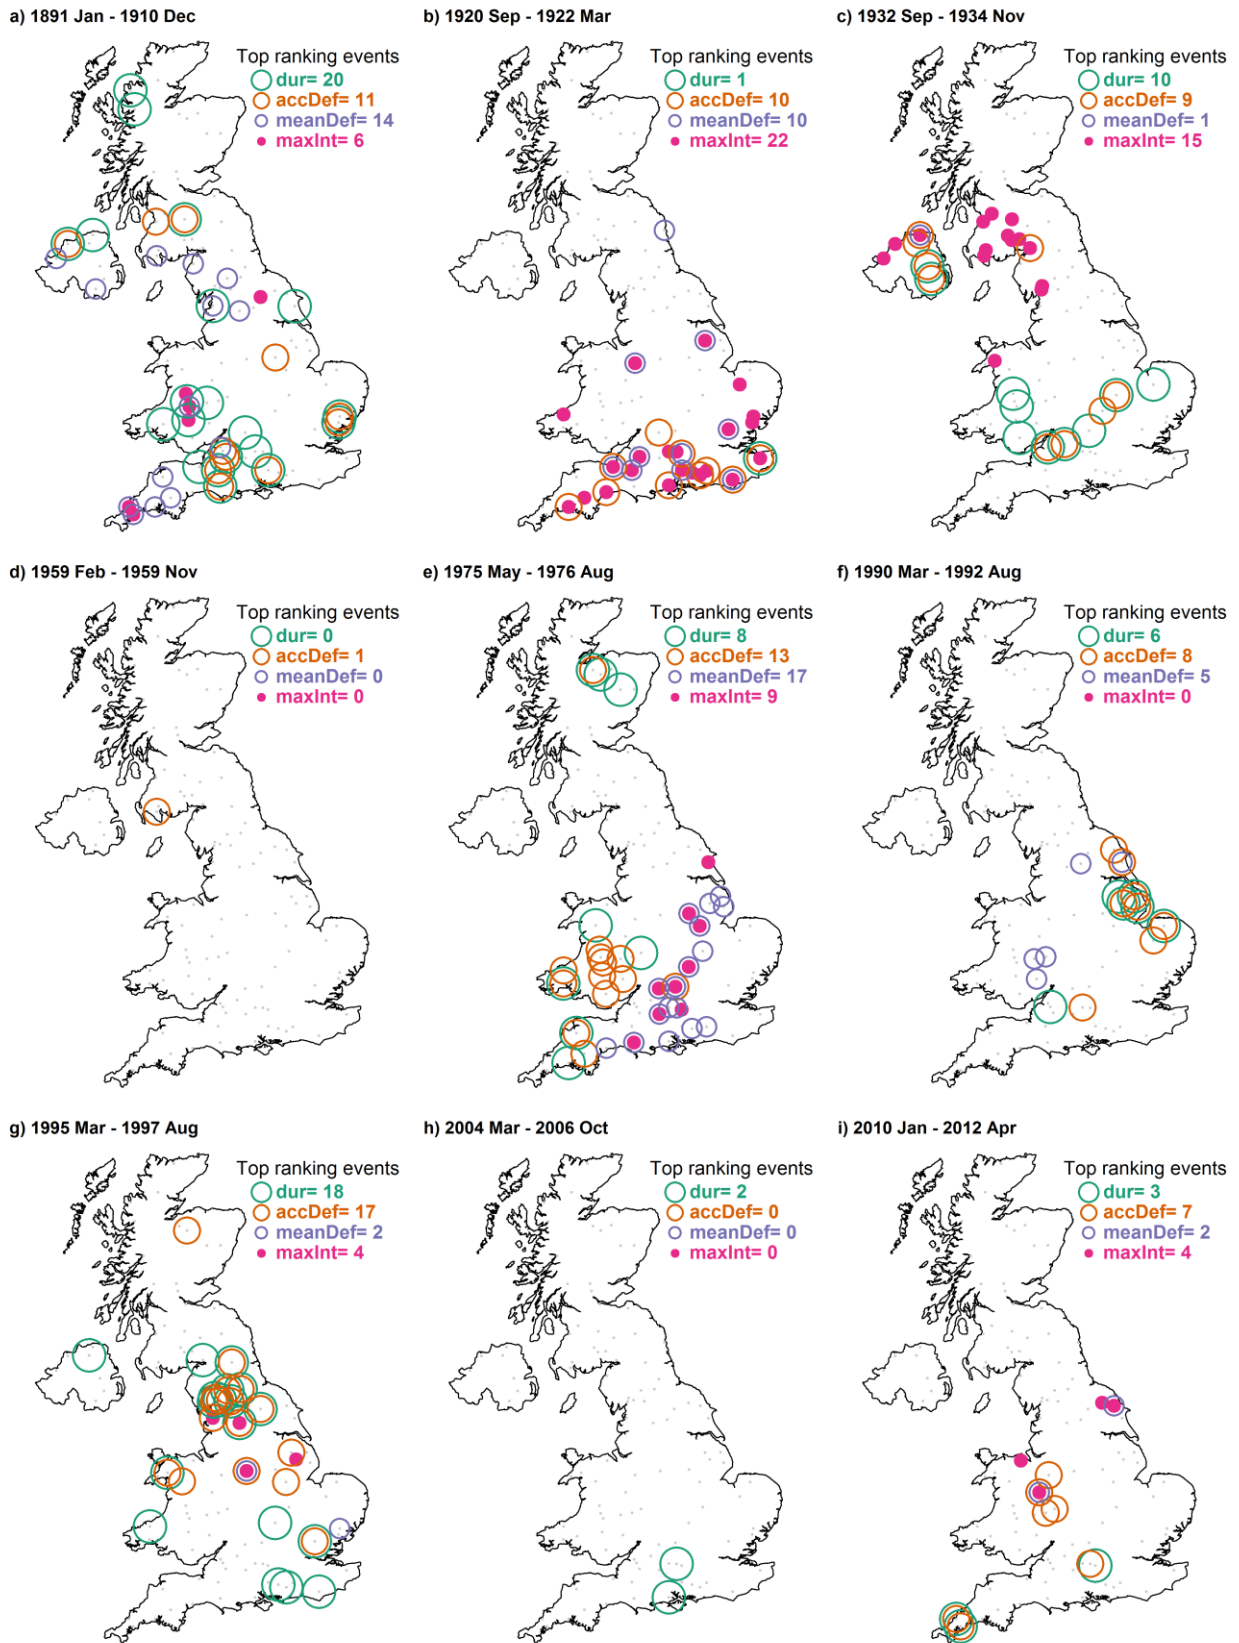

**Figure S5: Location and number of LFBN catchments where the top ranking SSI-3 event corresponds to major events (Table 1) for duration (dur), accumulated deficit (accDef), mean deficit (meanDef) and maximum intensity (maxInt). Each of the nine maps represents one of the major drought events listed in Table1. Each point on the maps represents the location of the 108 LFBN catchments. Points are coloured pink where the particular event was ranked most severe according to maximum intensity for that catchment. Similarly, points are circled in purple, orange and turquoise to indicate catchments where the particular event was ranked most severe in terms of mean deficit, accumulated deficit and duration, respectively. The numbers in the top right of each map show the number of catchments ranked as most severe for each characteristic for that particular event.**

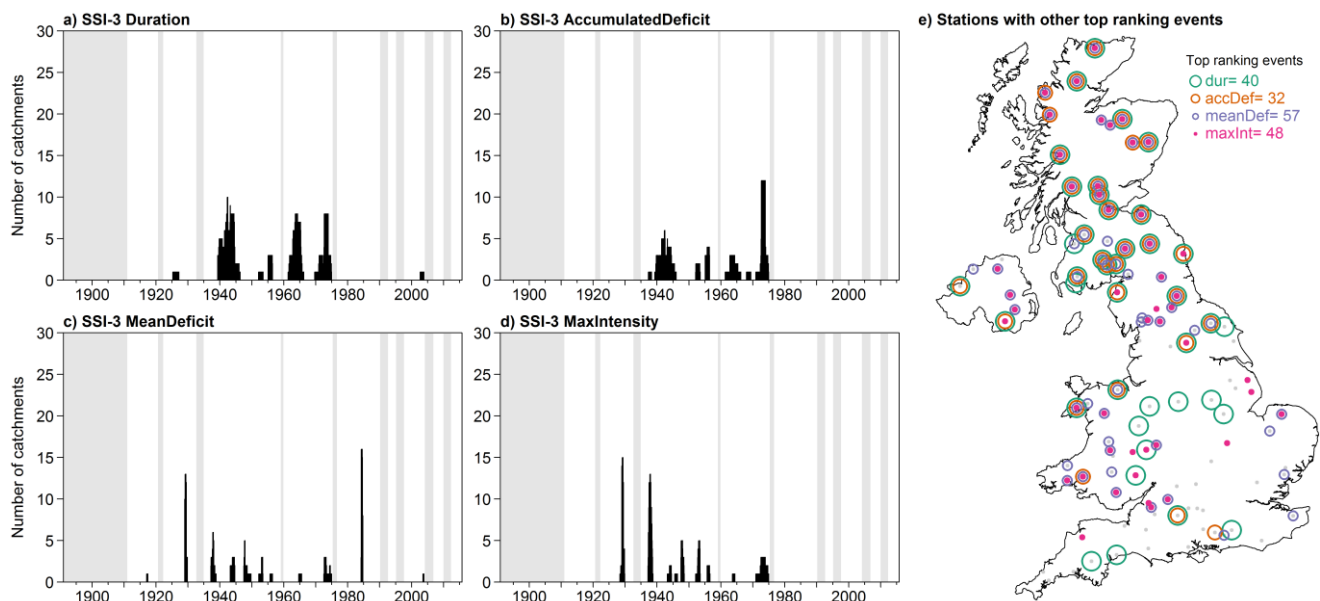

**Figure S6: Months when SSI-3 top ranked events occurred outside of the major events (shaded in grey) for the LFBN catchments and each event characteristic (a-d), and e) the location and number of catchments with other top ranking events for each event characteristic. Points are coloured as described in the caption for Figure S5.**

a) 1928 Jan - 1929 Dec

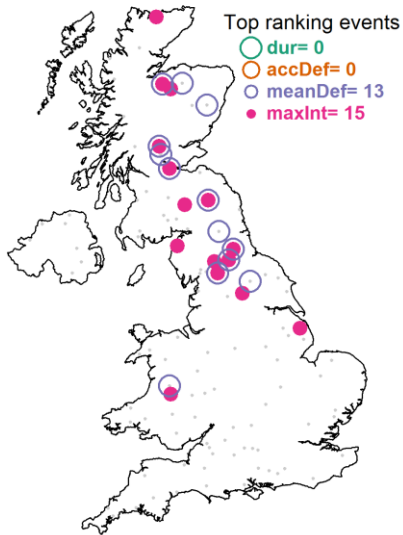

b) 1937 Jan - 1938 Dec

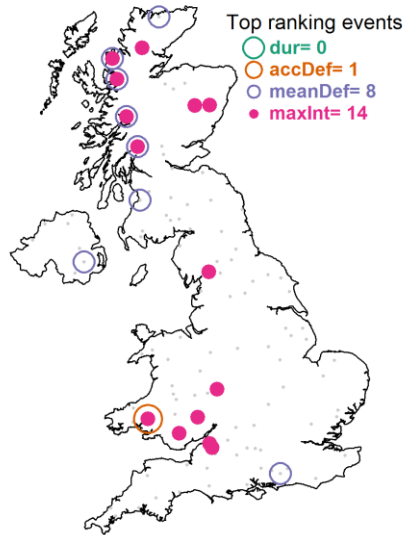

c) 1940 Jan - 1949 Dec

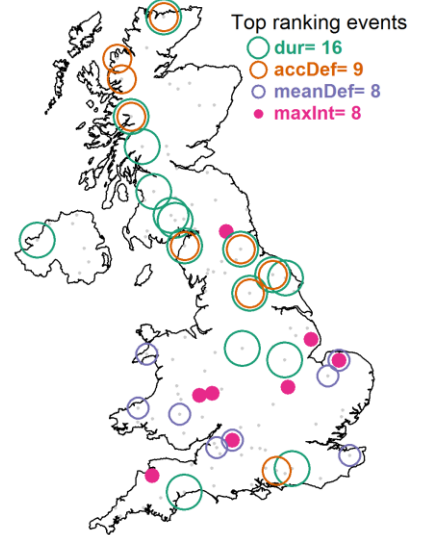

d) 1960 Jan - 1966 Dec

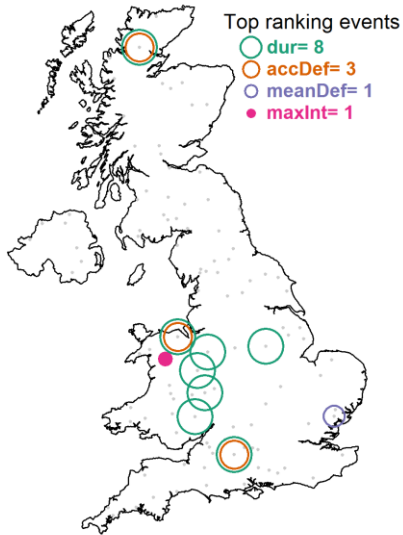

e) 1968 Jan - 1975 Apr

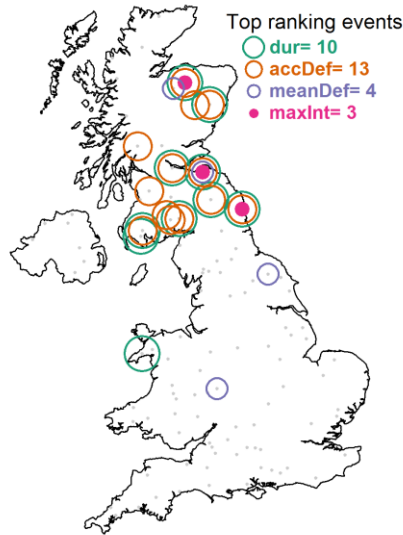

f) 1984 Jan - 1984 Dec

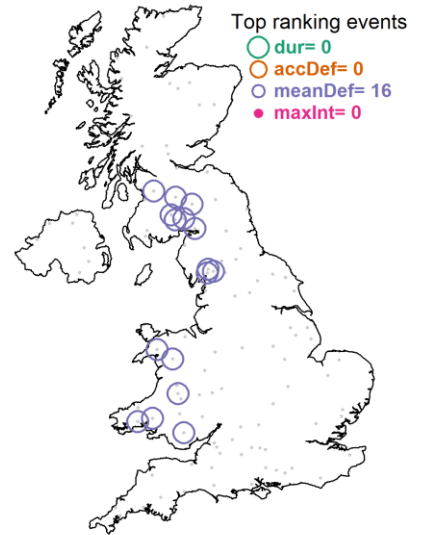

**Figure S7: Location and number of LFBN catchments where the top ranking SSI-3 events for each event characteristic occur in periods outside of the major drought events: a) 1928-129, b) 1937-1938, c) 1940-1949, d) 1960-1966, e) 1968-1975 and f) 1984. Points are coloured as described in the caption for Figure S5.**

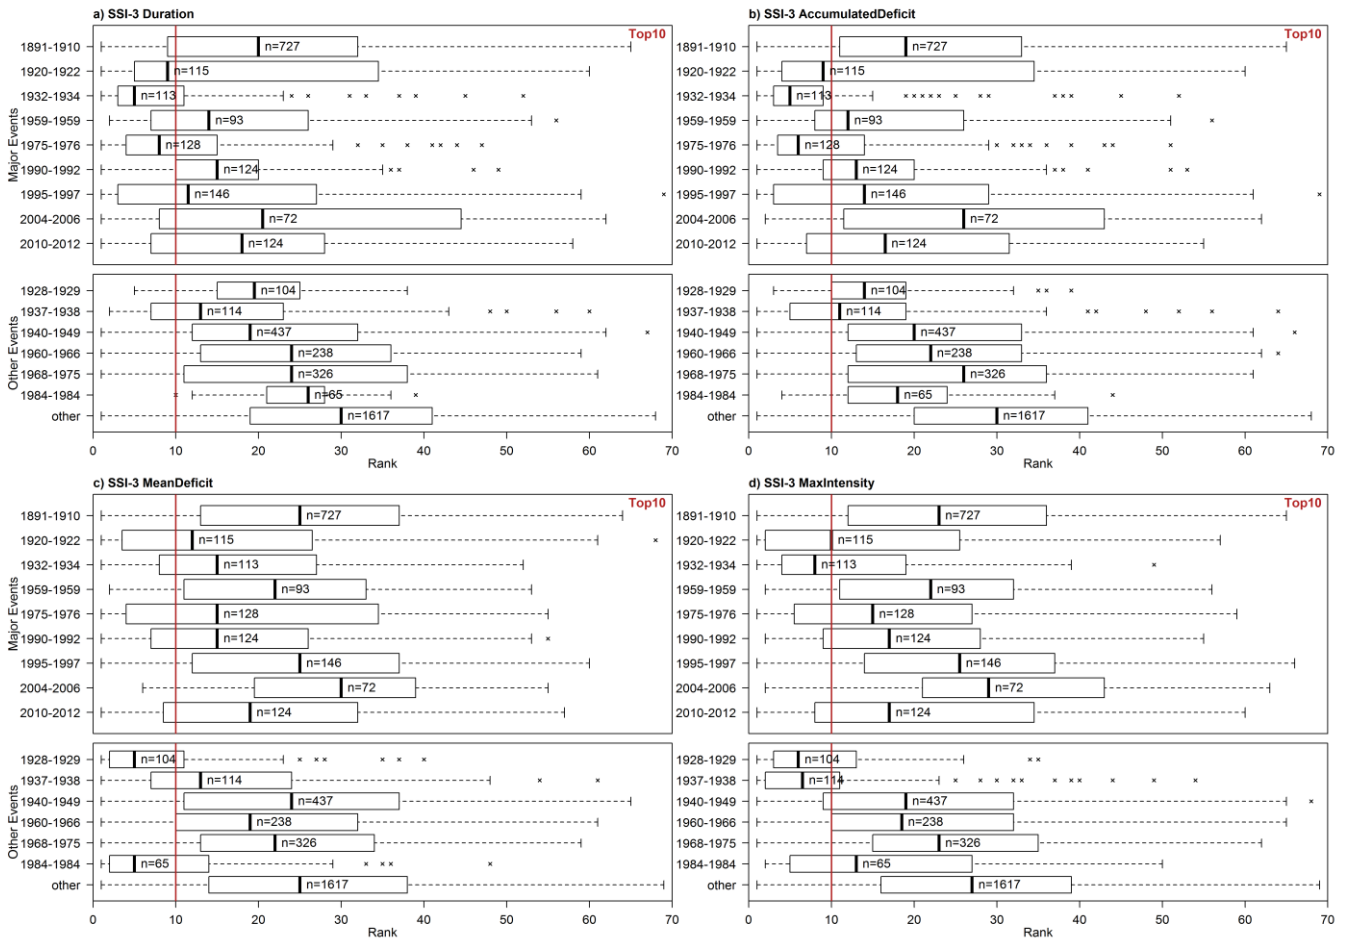

**Figure S8: Boxplots showing the ranks of all extracted SSI-3 events where they overlap with the major drought events (top panel for each event characteristic) and identified ‘other’ events (bottom panel for each event characteristic). Within each box, n refers to the total number of events (across the LFBN) identified that occurred within this period. As multiple events can occur within each given period in individual catchments, it is possible for the value of n to be greater than the number of catchments (i.e. 108).**

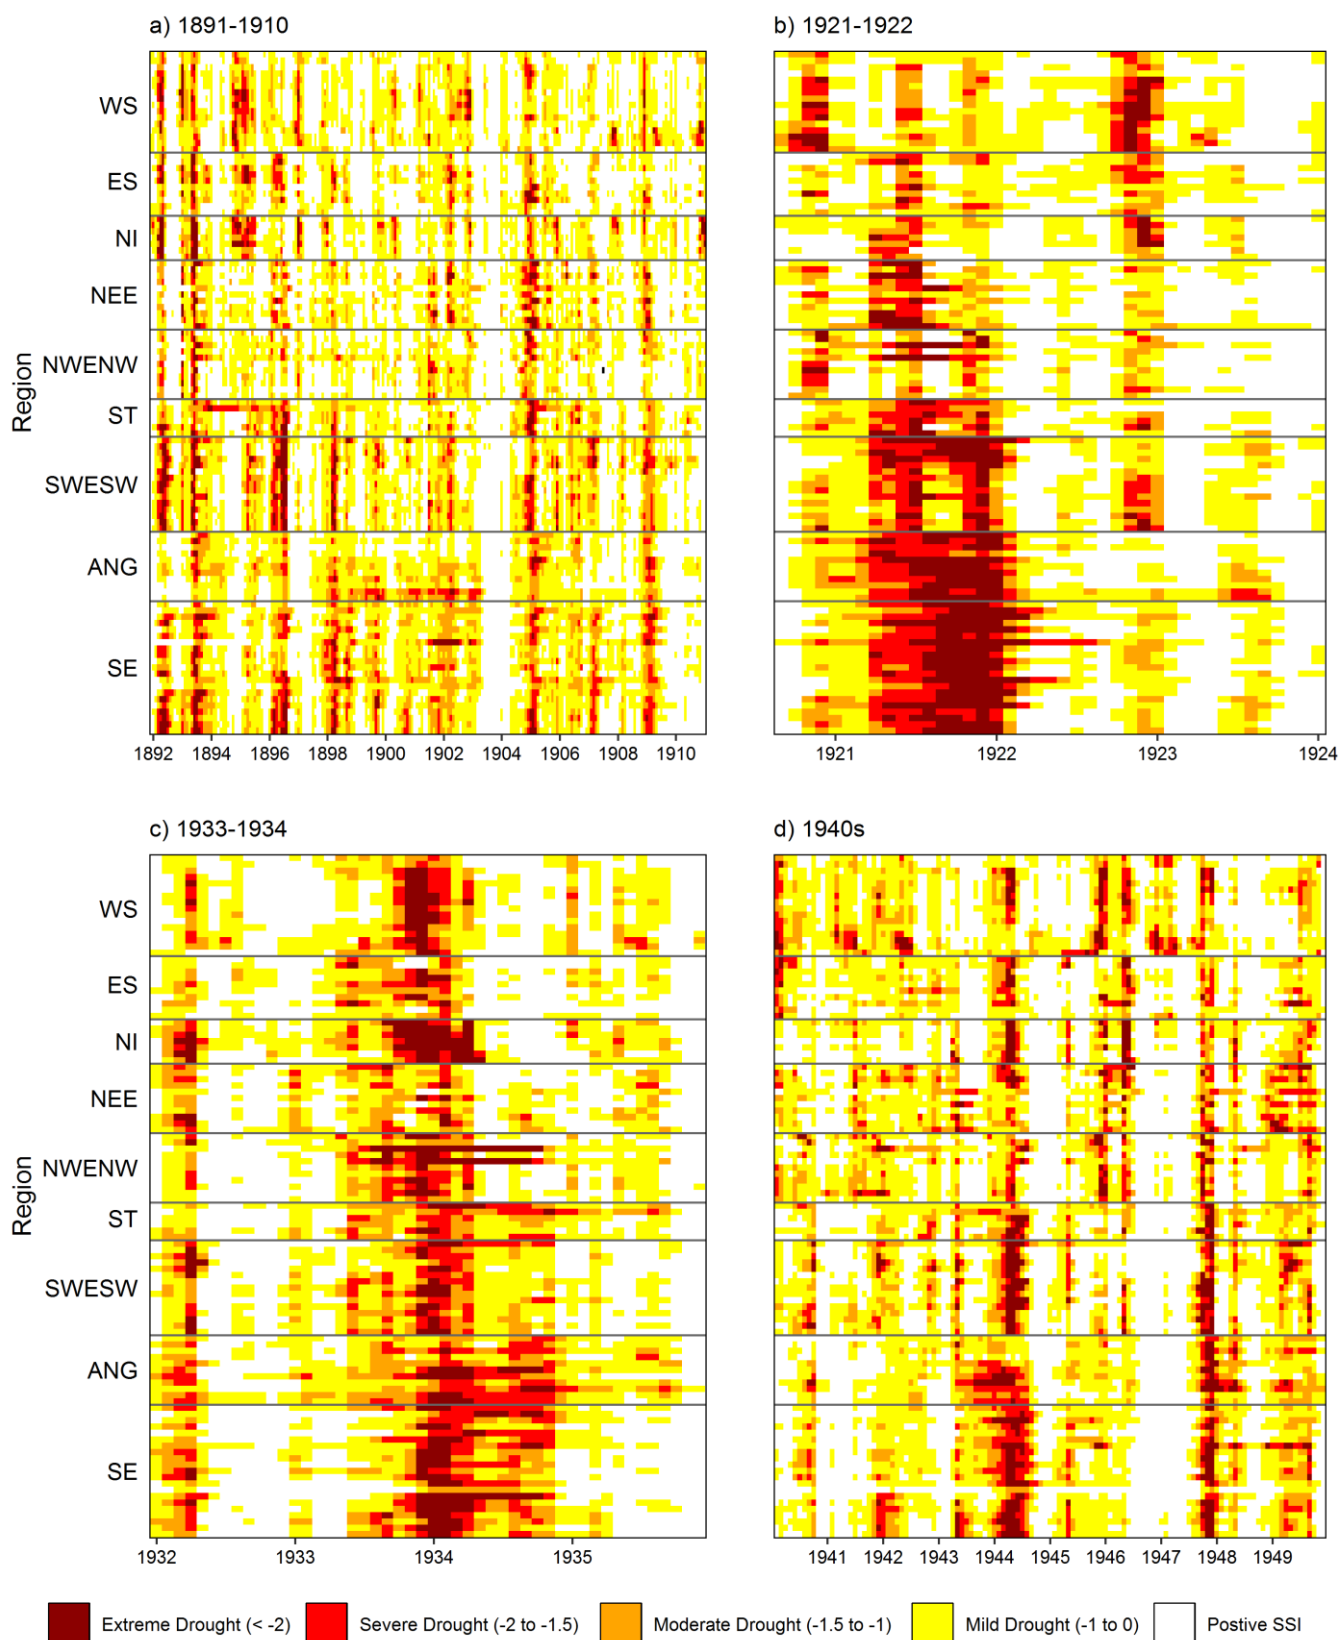

**Figure S9: Heat maps of reconstructed SSI-3 for LFBN catchments, arranged roughly from north to south with one row per catchment and regions marked for clarity for a) the ‘Long Drought’ period (1890s-1910s), b) 1921-1922, c) 1933-1935 and d) the 1940s.**

## References

National River Flow Archive: <https://nrfa.ceh.ac.uk/>, last access: 27 September 2019.

Smith, K. A., Tanguy, M., Hannaford, J., and Prudhomme, C.: Historic reconstructions of daily river flow for 303 UK catchments (1891-2015), NERC Environmental Information Data Centre, 10.5285/f710bed1-e564-47bf-b82c-4c2a2fe2810e, 2018.
